# Supplementary material for: Association between healthy lifestyle and memory decline in older adults: 10 year, population based, prospective cohort study
Source: PubMed Central journal article supplement — BMJ. 2023 Jan 25;380:e072691. doi: 10.1136/bmj-2022-072691 (PMC9872850; doi:10.1136/bmj-2022-072691), 2023-01-25
Supplement: jiaj072691.ww.pdf [file jiaj072691.ww.pdf]

## **Association between healthy lifestyle and memory decline in older adults: 10 year, population based, prospective cohort study**

Jianping Jia,<sup>1</sup> professor, Tan Zhao,<sup>1</sup> resident physician, Zhaojun Liu,<sup>1</sup> resident physician, Yumei Liang,<sup>1</sup> resident physician, Fangyu Li,<sup>1</sup> epidemiologist, Yan Li,<sup>1</sup> research fellow, Wenying Liu,<sup>1</sup> resident physician, Fang Li,<sup>2</sup> professor, Shengliang Shi,<sup>3</sup> professor, Chunkui Zhou,<sup>4</sup> professor, Heyun Yang,<sup>5</sup> director, Zhengluan Liao,<sup>6</sup> director, Yang Li,<sup>7</sup> professor, Huiying Zhao,<sup>8</sup> professor, Jintao Zhang,<sup>9</sup> director, Kunnan Zhang,<sup>10</sup> professor, Minchen Kan,<sup>11</sup> director, Shanshan Yang,<sup>12</sup> chief physician, Hao Li,<sup>13</sup> director, Zhongling Liu,<sup>14</sup> chief physician, Rong Ma,<sup>15</sup> director, Jihui Lv,<sup>16</sup> director, Yue Wang,<sup>17</sup> director, Xin Yan,<sup>18</sup> associate professor, Furu Liang,<sup>19</sup> chief physician, Xiaoling Yuan,<sup>20</sup> chief physician, Jinbiao Zhang,<sup>21</sup> director, Serge Gauthier,<sup>22</sup> professor, Jeffrey Cummings,<sup>23 24</sup> professor

<sup>1</sup>Innovation Center for Neurological Disorders and Department of Neurology, Xuanwu Hospital, Capital Medical University, National Center for Neurological Disorders, Beijing, China

<sup>2</sup>Department of Geriatric, Fuxing Hospital, Capital Medical University, Beijing, China

<sup>3</sup>Department of Neurology, The Second Affiliated Hospital of Guangxi Medical University, Guangxi, China

<sup>4</sup>Department of Neurology, The First Teaching Hospital of Jilin University, Jilin, China

<sup>5</sup>Department of Neurology, The First Hospital of Kunming, Yunnan, China

<sup>6</sup>Department of Psychiatry, Zhejiang Provincial People's Hospital, Zhejiang, China

<sup>7</sup>Department of Neurology, First Hospital of Shanxi Medical University, Shanxi, China

<sup>8</sup>Department of Neurology, Shijiazhuang City Hospital, Hebei, China

<sup>9</sup>Department of Neurology, the 960th Hospital of PLA, Shandong, China

<sup>10</sup>Department of Neurology, Jiangxi Provincial People's Hospital, Jiangxi, China

<sup>11</sup>Department of Neurology, Handan Central Hospital, Hebei, China

<sup>12</sup>Department of Neurology, Daqing Oilfield General Hospital, Heilongjiang, China

<sup>13</sup>Department of Neurology, The First People's Hospital of Yibin, Sichuan, China

<sup>14</sup>Department of Neurology, The Third Affiliated Hospital of Gansu University of Traditional Chinese Medicine, Gansu, China

<sup>15</sup>Department of Neurology, Dongguan People's Hospital, Guangdong, China

<sup>16</sup>Department of Psychiatry, Beijing Geriatric Hospital, Beijing, China

<sup>17</sup>Department of Neurology, Beijing Anding Hospital, Capital Medical University, Beijing, China

<sup>18</sup>Department of Neurology, Beijing Jishuitan Hospital, Beijing, China

<sup>19</sup>Department of Neurology, Baotou Central Hospital, Inner Mongolia, China

<sup>20</sup>Department of Neurology, Liaocheng People's Hospital, Shandong, China

<sup>21</sup>Department of Neurology, Weihai Municipal Hospital, Cheeloo College of Medicine, Shandong University, Shandong, China

<sup>22</sup>Department of Neurology and Neurosurgery, and Department of Psychiatry, McGill Centre for Studies in Aging, McGill University, Montreal, QC, Canada

<sup>23</sup>Chambers-Grundy Center for Transformative Neuroscience, Department of Brain Health, University of Nevada, Las Vegas, NV, USA

<sup>24</sup>Cleveland Clinic Lou Ruvo Center for Brain Health, Las Vegas, NV, USA

## **Supplementary data**

- 1. Participant enrollment procedures**
- 2. China cognition and ageing study (COAST)-Healthy behavior questionnaire**
- 3. Supplementary table 1. Distribution of missing values with different follow-up years**
- 4. Supplementary table 2. Demographic characteristics of APOE  $\epsilon$ 4 carriers and non-carriers at baseline**
- 5. Supplementary table 3. Global cognition trajectory in the cognitively normal population using linear mixed effect model**
- 6. Supplementary table 4. Memory trajectory in the cognitively normal population using linear mixed effect model**
- 7. Supplementary table 5. Longitudinal change in memory among APOE  $\epsilon$ 4 carriers and non-carriers**
- 8. Supplementary table 6. Longitudinal change in memory associated with each lifestyle factor in the cognitively normal population**
- 9. Supplementary table 7. Lifestyle effect on memory decline with age increasing in the cognitively normal population**
- 10. Supplementary table 8. Hazard ratios for the onset of dementia and MCI in the unfavourable, average, and favourable groups for APOE stratified population**
- 12. Supplementary table 10. Longitudinal change in memory associated with the number of lifestyle factors in the cognitively normal population**
- 13. Supplementary table 11. Weighted scores of each health lifestyle factor based on  $\beta$  coefficient**
- 14. Supplementary table 12. Longitudinal change in memory associated with the weighted lifestyle score in the cognitively normal population**
- 15. Supplementary table 13. Longitudinal change in memory after excluding each healthy lifestyle factor in the cognitively normal population**
- 16. Supplementary table 14. Lifestyle effect on memory in participants without mild cognitive impairment or dementia throughout the follow-up**
- 17. Supplementary table 15. Lifestyle effect on memory in participants without drop out or death throughout the follow-up**
- 18. Supplementary figure 1. Directed acyclic graphs (DAG)**
- 19. Supplementary figure 2. Global cognition and memory trajectories in the cognitively normal and APOE  $\epsilon$ 4 stratified populations**

**20. Supplementary figure 3. Test of reverse causality between lifestyle and memory function**

## 1. Participant enrollment procedures

For random selection, we considered geographical regions, degree of urbanization, economic development status, and sex and age distribution for the site selection. In stage 1, we chose 12 provinces, metropolises, and autonomous areas that were representative of the socioeconomic status and lifestyles of the three major geographical regions in China (north, south, and west). In stage 2, we randomly selected one economically developed city (classified as urban, with >500000 residents, at or above the median provincial gross domestic product [GDP]) and one underdeveloped city (classified as urban, with >500000 residents, below the median provincial GDP) from each of the 12 provinces or autonomous areas. Meanwhile, we randomly selected one economically developed county (classified as rural, with ≤500000 residents, at or above the median provincial GDP) and one underdeveloped county (classified as rural, with ≤500000 residents, below the median provincial GDP). In stage 3, we randomly selected two districts from each city and two townships from each county. In stage 4, we randomly selected four communities from each district and four villages from each township; communities or villages usually have 600-1200 households. In brief, there were four levels of sampling units: the primary sampling unit was province or autonomous area, secondary was city (urban) or county (rural), tertiary was district (urban) or township (rural), and quaternary was community (urban) or village (rural).

## 2. China cognition and ageing study (COAST)-Healthy behavior questionnaire

The **Part I** in questionnaire is designed for participants to complete, and the **Part II** is for investigators to review and evaluate the information of **Part I**.

### Part I

#### ● About your health conditions

First, we would like to ask you about your medical problems. Please choose appropriate answers.

1. Have you ever been diagnosed with hypertension by a doctor? Yes  No

If yes, if you take anti-hypertensive medication regularly? Yes  No

2. Have you ever been diagnosed with diabetes mellitus by a doctor? Yes  No

If yes, if you take anti-diabetes mellitus medication regularly? Yes  No

3. Have you ever been diagnosed with hyperlipidemia by a doctor? Yes  No

If you know your total cholesterol levels in the past year, please write it in detail. \_\_\_\_\_ mmol/L

|                                                                                                                                            |                                                                                                                  |
|--------------------------------------------------------------------------------------------------------------------------------------------|------------------------------------------------------------------------------------------------------------------|
| <b>4. Have you ever been diagnosed with a cardiovascular event or related cerebrovascular disease?</b>                                     | Yes <input type="checkbox"/> No <input type="checkbox"/>                                                         |
| <b>5. Have you ever suffered a traumatic brain injury?</b>                                                                                 | Yes <input type="checkbox"/> No <input type="checkbox"/>                                                         |
| <b>6. Do you have depression diagnosed by a doctor or other health professionals?</b>                                                      | Yes <input type="checkbox"/> No <input type="checkbox"/>                                                         |
| <b>7. How about your body weight and height without your clothes and shoes on? Please measure your height and weight yourself on site.</b> | Weight (kg)___<br>Height (cm)___                                                                                 |
| <b>8. How many education years did you receive?</b>                                                                                        | Education years___                                                                                               |
| <b>9. Have you taken any alcoholic drinks in the past year?<br/>If yes, please write it in detail.</b>                                     | Yes <input type="checkbox"/> No <input type="checkbox"/><br>Frequency__ (per week)<br>and amount__(g) (per week) |
| <b>Have you quitted drinking?</b>                                                                                                          | If yes, how long? __                                                                                             |
| <b>10. Do you have a smoking habit?<br/>If yes, please write it in detail.</b>                                                             | Yes <input type="checkbox"/> No <input type="checkbox"/><br>Frequency__ (per week)<br>and amount__(per week)     |
| <b>Have you quitted smoking? If yes, how long?</b>                                                                                         | If yes, how long? __                                                                                             |

---

● **About your diet**

Second, we would like to ask you about your diet in the past year. We will provide the recommended amount of food for reference in the picture below (we use the fist or hand of an adult man as a reference).

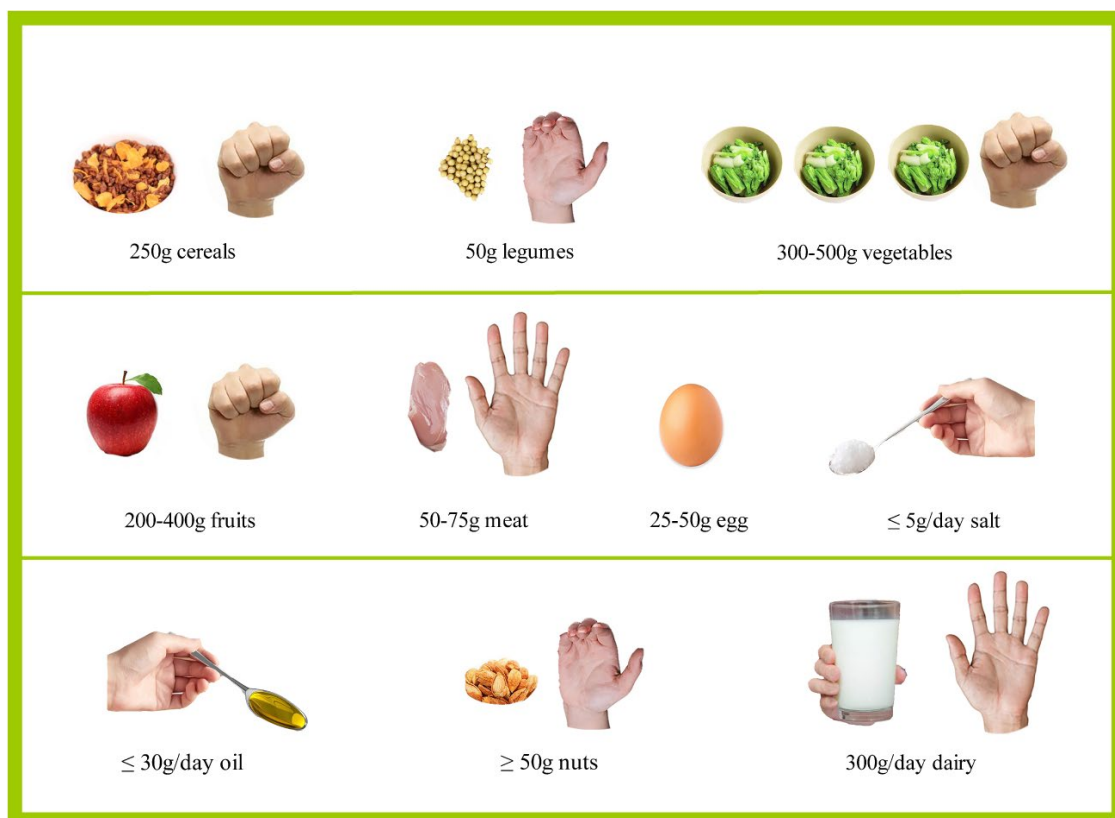

1. How much cereals did you take daily?
  - <250 g/day
  - 250-400 g/day
  - >400 g/day
2. How much legumes did you take daily?
  - <30 g/day
  - 30-50 g/day
  - >50 g/day
3. How much vegetables did you take daily?
  - <300 g/day
  - 300-500 g/day
  - >500 g/day
4. What was your daily fruit intake?
  - <200 g/day
  - 200-400 g/day
  - >400 g/day
5. What was your daily meat intake?
  - <50 g/day
  - 50-75 g/day
  - >75 g/day
6. What was your daily egg intake?
  - <25 g/day
  - 25-50 g/day
  - >50 g/day
7. What was your daily salt intake?
  - ≤ 5 g/day
  - > 5 g/day
8. What was your daily oil intake?
  - ≤ 30 g/day

|                                                              |                                                          |
|--------------------------------------------------------------|----------------------------------------------------------|
|                                                              | >30 g/day <input type="checkbox"/>                       |
| <b>9. How often did you consume fish products per week?</b>  | ≥2 times per week <input type="checkbox"/>               |
|                                                              | <2 times per week <input type="checkbox"/>               |
| <b>10. Did you have tea-drinking habits?</b>                 | Yes <input type="checkbox"/> No <input type="checkbox"/> |
| <b>If yes, how many cups did you usually drink per week?</b> | Number of cups per week __                               |
| <b>11. What was your daily nuts intake?</b>                  | ≥50g per week <input type="checkbox"/>                   |
|                                                              | <50g per week <input type="checkbox"/>                   |
| <b>12. What was your daily dairy intake?</b>                 | Far more than 300g per week <input type="checkbox"/>     |
|                                                              | Far less than 300g per week <input type="checkbox"/>     |
|                                                              | Approximately 300g per week <input type="checkbox"/>     |

● **About your physical exercise**

These questions asked you about the time you spent being physically active in the past year.

|                                                                                                                                              |                                                          |
|----------------------------------------------------------------------------------------------------------------------------------------------|----------------------------------------------------------|
| <b>1. Did you walk more than 10,000 steps each time?</b>                                                                                     | Yes <input type="checkbox"/> No <input type="checkbox"/> |
| <b>If yes, how many times per week?</b>                                                                                                      | ≥7 times per week <input type="checkbox"/>               |
|                                                                                                                                              | 6 times per week <input type="checkbox"/>                |
|                                                                                                                                              | 5 times per week <input type="checkbox"/>                |
|                                                                                                                                              | 4 times per week <input type="checkbox"/>                |
|                                                                                                                                              | 3 times per week <input type="checkbox"/>                |
|                                                                                                                                              | 2 times per week <input type="checkbox"/>                |
|                                                                                                                                              | 1 time per week <input type="checkbox"/>                 |
| <b>2. Did you often take Tai Chi exercise (exceeding 30 minutes each time)?</b>                                                              | Yes <input type="checkbox"/> No <input type="checkbox"/> |
| <b>If yes, how many times per week?</b>                                                                                                      | ≥7 times per week <input type="checkbox"/>               |
|                                                                                                                                              | 6 times per week <input type="checkbox"/>                |
|                                                                                                                                              | 5 times per week <input type="checkbox"/>                |
|                                                                                                                                              | 4 times per week <input type="checkbox"/>                |
|                                                                                                                                              | 3 times per week <input type="checkbox"/>                |
|                                                                                                                                              | 2 times per week <input type="checkbox"/>                |
|                                                                                                                                              | 1 time per week <input type="checkbox"/>                 |
| <b>3. Did you regularly participate in moderate-intensity physical exercise (requiring moderate effort and accelerating the heart rate)?</b> | Yes <input type="checkbox"/> No <input type="checkbox"/> |
| <b>If yes, how many times per week?</b>                                                                                                      |                                                          |



How long in total per week?

≥7 times per week

6 times per week

5 times per week

4 times per week

3 times per week

2 times per week

1 time per week

\_\_ minutes per week

4. Did you regularly participate in vigorous activity (requires a large amount of effort and causes rapid breathing and a substantial increase in heart rate), such as running, fast swimming, etc.?

Yes  No

If yes, how many times per week?

≥7 times per week

6 times per week

5 times per week

4 times per week

3 times per week

2 times per week

1 time per week

How long in total per week?

\_\_ minutes per week

● About your cognitive activities

These questions are about your cognitive activities in the past year.

1. Did you have a writing habit (diary, letters, emails, etc., including online)?

Yes  No

If yes, how often did you write for at least 30 minutes each time?

≥7 times per week

6 times per week

5 times per week

4 times per week

3 times per week

2 times per week

1 time per week

2. Did you have a reading habit (newspaper, magazine, books, etc., including online)?

Yes  No

If yes, how often did you read for at least 30 minutes each time?

≥7 times per week

6 times per week

5 times per week

4 times per week

3 times per week

2 times per week

1 time per week

3. Did you play chess or cards (go game, mah-jong, poker, etc., including online) regularly? Yes  No

If yes, how often did you usually play them (at least 30 minutes each time)?  $\geq 7$  times per week

6 times per week

5 times per week

4 times per week

3 times per week

2 times per week

1 time per week

4. Did you have any other hobbies (calligraphy, playing music, etc.)? Yes  No

If yes, how often did you play (at least 30 minutes each time?)  $\geq 7$  times per week

6 times per week

5 times per week

4 times per week

3 times per week

2 times per week

1 time per week

#### ● About your social contacts

These questions about your social contact in the past year.

1. Did you attend meetings or parties regularly? Yes  No

If yes, how often did you attend?  $\geq 7$  times per week

6 times per week

5 times per week

4 times per week

3 times per week

2 times per week

1 time per week

2. Did you get together with friends or relatives regularly? Yes  No

If yes, how often did you get with them?  $\geq 7$  times per week

- 6 times per week
- 5 times per week
- 4 times per week
- 3 times per week
- 2 times per week
- 1 time per week

**3. Did you participate in any other social activities (party, traveling, chatting online, etc.) regularly?** Yes  No

**If yes, how often did you participate in these activities?**

- ≥7 times per week
- 6 times per week
- 5 times per week
- 4 times per week
- 3 times per week
- 2 times per week
- 1 time per week

**Part II**

**2.1 Risk factors<sup>1-28</sup>:** Risk factors such as hypertension, hyperlipidemia, and diabetes are based on participants' self-reports, physical examinations, and medical records.

| Risk factors                               | Answers                      |                             |
|--------------------------------------------|------------------------------|-----------------------------|
| Hypertension <sup>a</sup>                  | Yes <input type="checkbox"/> | No <input type="checkbox"/> |
| Diabetes mellitus <sup>b</sup>             | Yes <input type="checkbox"/> | No <input type="checkbox"/> |
| Hyperlipidemia <sup>c</sup>                | Yes <input type="checkbox"/> | No <input type="checkbox"/> |
| Cardiocerebrovascular disease <sup>d</sup> | Yes <input type="checkbox"/> | No <input type="checkbox"/> |
| Head injury                                | Yes <input type="checkbox"/> | No <input type="checkbox"/> |
| Depression <sup>e</sup>                    | Yes <input type="checkbox"/> | No <input type="checkbox"/> |
| Overweight or obesity <sup>f</sup>         | Yes <input type="checkbox"/> | No <input type="checkbox"/> |
| Less education <sup>g</sup>                | Yes <input type="checkbox"/> | No <input type="checkbox"/> |
| Heavy drinking <sup>h</sup>                | Yes <input type="checkbox"/> | No <input type="checkbox"/> |
| Smoking                                    | Yes <input type="checkbox"/> | No <input type="checkbox"/> |
| Number of Yes: <u>          </u>           |                              |                             |

**Notes:**

a Hypertension: average of 2 or more systolic blood pressure ≥140 mmHg and/or diastolic blood pressure ≥90 mmHg during at least two tests in different dates or regular use of antihypertensive medication.<sup>29</sup>

b Diabetes mellitus: fasting blood glucose ≥7.0 mmol/L or random blood glucose ≥11.1 mmol/L or regular hypoglycemic medication use.<sup>30</sup>

c Hyperlipidemia: including hypercholesterolaemia (total cholesterol ≥6.2 mmol/L or 240 mg/dL), low-density lipoprotein abnormalities (low-density lipoprotein-C ≥4.1 mmol/L or 160 mg/dL) or hypertriglyceridemia (triglyceride ≥2.3 mmol/L or 200 mg/dL).<sup>31</sup>

d Cardiocerebrovascular disease: heart and/or cerebrovascular diseases.

e Depression: Individuals who had a previous diagnosis of depression or a Geriatric Depression Scale score of ≥11 as an indicator of depression.<sup>32</sup>

f Overweight or obesity: Overweight is defined as body mass index (BMI, weight/height<sup>2</sup>) 25.0-29.<sup>3</sup> kg/m<sup>2</sup>, and obesity is defined as BMI >30 kg/m.<sup>2 15</sup>

g Less education: ≤6 years of education.

h Heavy drinking: daily alcohol consumption exceeds 60g.<sup>33</sup>

**2.2 Diet<sup>34-36</sup>:** The questionnaire for this part refers to the Chinese Dietary Guidelines (2007) and previous literature.

| Whether participants' diet within the recommended amount | Answers                      |                             |
|----------------------------------------------------------|------------------------------|-----------------------------|
| Cereals (250-400 g/day)                                  | Yes <input type="checkbox"/> | No <input type="checkbox"/> |
| Legumes (30-50 g/day)                                    | Yes <input type="checkbox"/> | No <input type="checkbox"/> |
| Vegetables (≥300 g/day)                                  | Yes <input type="checkbox"/> | No <input type="checkbox"/> |
| Fruits (≥200 g/day)                                      | Yes <input type="checkbox"/> | No <input type="checkbox"/> |
| Meat (50-75 g/day)                                       | Yes <input type="checkbox"/> | No <input type="checkbox"/> |
| Eggs (25-50 g/day)                                       | Yes <input type="checkbox"/> | No <input type="checkbox"/> |
| Salt (≤5 g/day)                                          | Yes <input type="checkbox"/> | No <input type="checkbox"/> |
| Oil (≤30 g/day)                                          | Yes <input type="checkbox"/> | No <input type="checkbox"/> |
| Fish (≥2 times per week)                                 | Yes <input type="checkbox"/> | No <input type="checkbox"/> |
| Tea drinking habits (have tea drinking habit)            | Yes <input type="checkbox"/> | No <input type="checkbox"/> |
| Nuts (≥50 g/week)                                        | Yes <input type="checkbox"/> | No <input type="checkbox"/> |
| Dairy (approximately 300 g/week)                         | Yes <input type="checkbox"/> | No <input type="checkbox"/> |
| Number of eligible diet items: ____                      |                              |                             |

**2.3 Physical exercise<sup>37-39</sup>:** Please recheck and evaluate the frequency and time spent on the following activities

| Whether participants have the following physical exercise habits | Answers                                                                                                                                                                                                                                                                                                                                                                            |
|------------------------------------------------------------------|------------------------------------------------------------------------------------------------------------------------------------------------------------------------------------------------------------------------------------------------------------------------------------------------------------------------------------------------------------------------------------|
| Walk more than 10000 steps                                       | ≥7 times per week <input type="checkbox"/><br>6 times per week <input type="checkbox"/><br>5 times per week <input type="checkbox"/><br>4 times per week <input type="checkbox"/><br>3 times per week <input type="checkbox"/><br>2 times per week <input type="checkbox"/><br>1 time per week <input type="checkbox"/><br>Never <input type="checkbox"/><br>____ minutes per week |

Take Tai Chi exercise (exceeding 30 minutes each time)

≥7 times per week

6 times per week

5 times per week

4 times per week

3 times per week

2 times per week

1 time per week

Never

\_\_ minutes per week

Regularly participate in moderate-intensity physical exercise

≥7 times per week

6 times per week

5 times per week

4 times per week

3 times per week

2 times per week

1 time per week

Never

\_\_ minutes per week

Regularly participate in vigorous activity

≥7 times per week

6 times per week

5 times per week

4 times per week

3 times per week

2 times per week

1 time per week

Never

\_\_ minutes per week

Physical exercise: \_\_

---

**2.4 Cognitive activities<sup>40-42</sup>:** Please record and evaluate the time and frequency of engaging the following activities

| Whether participants have the following cognitive activities                                      | Answers                                                                                                                                                                                                                                                                                                                                                   |
|---------------------------------------------------------------------------------------------------|-----------------------------------------------------------------------------------------------------------------------------------------------------------------------------------------------------------------------------------------------------------------------------------------------------------------------------------------------------------|
| Writing habits (diary, letters, emails, etc., including online) for at least 30 minutes each time | ≥7 times per week <input type="checkbox"/><br>6 times per week <input type="checkbox"/><br>5 times per week <input type="checkbox"/><br>4 times per week <input type="checkbox"/><br>3 times per week <input type="checkbox"/><br>2 times per week <input type="checkbox"/><br>1 time per week <input type="checkbox"/><br>Never <input type="checkbox"/> |

Reading habit (newspaper, magazine, books, online information etc.) for at least 30 minutes each time

$\geq 7$  times per week  
 6 times per week  
 5 times per week  
 4 times per week  
 3 times per week  
 2 times per week  
 1 time per week  
 Never

Playing chess or cards (Go game, mah-jong, poker, etc., including online) for at least 30 minutes each time

$\geq 7$  times per week  
 6 times per week  
 5 times per week  
 4 times per week  
 3 times per week  
 2 times per week  
 1 time per week  
 Never

Have any other hobbies (calligraphy, playing music, etc.) for at least 30 minutes each time

$\geq 7$  times per week  
 6 times per week  
 5 times per week  
 4 times per week  
 3 times per week  
 2 times per week  
 1 time per week  
 Never

Cognitive exercise: \_\_\_\_\_

**2.5 Social contacts**<sup>23,42,43-45</sup>: Please record and evaluate the frequency of engaging the following activities

| Whether participants have the following social contacts | Answer                                                                                                                                                                                                                                                                                                                                                          |
|---------------------------------------------------------|-----------------------------------------------------------------------------------------------------------------------------------------------------------------------------------------------------------------------------------------------------------------------------------------------------------------------------------------------------------------|
| Participation in meetings or parties                    | <input type="checkbox"/> $\geq 7$ times per week<br><input type="checkbox"/> 6 times per week<br><input type="checkbox"/> 5 times per week<br><input type="checkbox"/> 4 times per week<br><input type="checkbox"/> 3 times per week<br><input type="checkbox"/> 2 times per week<br><input type="checkbox"/> 1 time per week<br><input type="checkbox"/> Never |
| Visiting friends or relatives                           | <input type="checkbox"/> $\geq 7$ times per week<br><input type="checkbox"/> 6 times per week                                                                                                                                                                                                                                                                   |

- 5 times per week
- 4 times per week
- 3 times per week
- 2 times per week
- 1 time per week
- Never

Other social contacts

- $\geq 7$  times per week
- 6 times per week
- 5 times per week
- 4 times per week
- 3 times per week
- 2 times per week
- 1 time per week
- Never

Social contact:

### 3. Supplementary table 1. Distribution of missing values with different follow-up years

|                           | 2012  |               |     | 2014  |               |     | 2016  |               |     | 2019  |               |     |
|---------------------------|-------|---------------|-----|-------|---------------|-----|-------|---------------|-----|-------|---------------|-----|
|                           | N     | Missing value | (%) |
| BMI (kg/m <sup>2</sup> )  | 28820 | 252           | 0.9 | 26551 | 302           | 1.1 | 24083 | 343           | 1.4 | 21221 | 372           | 1.7 |
| MMSE                      | 28948 | 124           | 0.4 | 26585 | 268           | 1   | 24141 | 285           | 1.2 | 21261 | 332           | 1.5 |
| Hypertension              | 28839 | 233           | 0.8 | 26587 | 266           | 1   | 24102 | 324           | 1.3 | 21290 | 303           | 1.4 |
| Diabetes                  | 28789 | 283           | 1   | 26596 | 257           | 1   | 24087 | 339           | 1.4 | 21267 | 326           | 1.5 |
| Heart attack              | 28860 | 212           | 0.7 | 26609 | 244           | 0.9 | 24127 | 299           | 1.2 | 21290 | 303           | 1.4 |
| Head injury               | 28836 | 236           | 0.8 | 26589 | 264           | 1   | 24074 | 352           | 1.4 | 21250 | 343           | 1.6 |
| Depression                | 28975 | 97            | 0.3 | 26546 | 307           | 1.1 | 24135 | 291           | 1.2 | 21273 | 320           | 1.5 |
| Cerebrovascular disease   | 28960 | 112           | 0.4 | 26545 | 308           | 1.1 | 24116 | 310           | 1.3 | 21235 | 358           | 1.7 |
| Never or former smoking   | 28792 | 280           | 1   | 26589 | 264           | 1   | 24076 | 350           | 1.4 | 21259 | 334           | 1.5 |
| Never drinking            | 28945 | 127           | 0.4 | 26587 | 266           | 1   | 24078 | 348           | 1.4 | 21283 | 310           | 1.4 |
| Active cognitive activity | 28821 | 251           | 0.9 | 26534 | 319           | 1.2 | 24143 | 283           | 1.2 | 21257 | 336           | 1.6 |
| Regular physical exercise | 28946 | 126           | 0.4 | 26602 | 251           | 0.9 | 24092 | 334           | 1.4 | 21283 | 310           | 1.4 |
| Active social contact     | 28893 | 179           | 0.6 | 26519 | 334           | 1.2 | 24112 | 314           | 1.3 | 21264 | 329           | 1.5 |
| Healthy diet              | 28877 | 195           | 0.7 | 26597 | 256           | 1   | 24082 | 344           | 1.4 | 21238 | 355           | 1.6 |



**4. Supplementary table 2. Demographic characteristics of APOE  $\epsilon$ 4 carriers and non-carriers at baseline**

| Characteristics                            | APOE $\epsilon$ 4 status |                         | P      |
|--------------------------------------------|--------------------------|-------------------------|--------|
|                                            | $\epsilon$ 4 - (n=23133) | $\epsilon$ 4 + (n=5939) |        |
|                                            | mean $\pm$ SD /no.(%)    | mean $\pm$ SD /no.(%)   |        |
| Female                                     | 11246 (48.61)            | 2867 (48.27)            | 0.64   |
| Age (years)                                | 72.23 $\pm$ 6.62         | 72.21 $\pm$ 6.58        | 0.81   |
| Place of residence                         |                          |                         |        |
| Rural                                      | 10933 (47.26)            | 2809 (47.30)            | 0.96   |
| Urban                                      | 12200 (52.74)            | 3130 (52.70)            |        |
| Region                                     |                          |                         |        |
| North                                      | 6897 (29.81)             | 1773 (29.85)            | 0.69   |
| West                                       | 7603 (32.87)             | 1982 (33.37)            |        |
| South                                      | 8633 (37.32)             | 2184 (36.77)            |        |
| Marital status                             |                          |                         |        |
| Widowed                                    | 2075 (8.97)              | 518 (8.72)              | 0.66   |
| Divorced, separated, or single             | 2934 (12.68)             | 736 (12.39)             |        |
| Married                                    | 18124 (78.35)            | 4685 (78.89)            |        |
| Years of education                         |                          |                         |        |
| < 1                                        | 3362 (14.53)             | 880 (14.82)             | 0.83   |
| 1-6                                        | 7667 (33.14)             | 1951 (32.85)            |        |
| 7-12                                       | 9679 (41.84)             | 2503 (42.15)            |        |
| > 12                                       | 2425 (10.48)             | 605 (10.19)             |        |
| Monthly household income<br>(Chinese Yuan) |                          |                         |        |
| 1000-2999                                  | 1743 (7.53)              | 465 (7.83)              | 0.60   |
| 3000-4999                                  | 6974 (30.15)             | 1741 (29.31)            |        |
| 5000-10000                                 | 13797 (59.64)            | 3572 (60.14)            |        |
| >10000                                     | 619 (2.68)               | 161 (2.71)              |        |
| Occupation                                 |                          |                         |        |
| Manual laborer                             | 9738 (42.10)             | 2533 (42.65)            | 0.51   |
| Office worker                              | 7216 (31.19)             | 1860 (31.32)            |        |
| Household                                  | 3948 (17.07)             | 965 (16.25)             |        |
| Others                                     | 2231 (9.64)              | 581 (9.78)              |        |
| BMI (kg/m <sup>2</sup> )                   | 23.28 $\pm$ 4.08         | 23.35 $\pm$ 4.08        | 0.25   |
| MMSE score                                 | 27.52 $\pm$ 1.30         | 27.53 $\pm$ 1.30        | 0.59   |
| Medical illnesses                          |                          |                         |        |
| Hypertension                               | 8745 (37.80)             | 2297 (38.68)            | 0.22   |
| Diabetes                                   | 4627 (20.00)             | 1196 (20.14)            | 0.81   |
| Hyperlipidemia                             | 3079 (13.31)             | 4763 (80.20)            | <0.001 |
| Heart attack                               | 1541 (6.66)              | 372 (6.26)              | 0.27   |
| Head injury                                | 1242 (5.37)              | 344 (5.79)              | 0.20   |
| Depression                                 | 1378 (5.96)              | 362 (6.10)              | 0.69   |

|                                     |               |              |        |
|-------------------------------------|---------------|--------------|--------|
| Cerebrovascular disease             | 2375 (10.27)  | 643 (10.83)  | 0.21   |
| Healthy lifestyle factors           |               |              |        |
| Never or former smoking             | 18470 (79.84) | 4736 (79.74) | 0.87   |
| Never drinking                      | 9164 (39.61)  | 2341 (39.42) | 0.78   |
| Active cognitive activity           | 5883 (25.43)  | 1268 (21.35) | <0.001 |
| Regular physical exercise           | 5657 (24.45)  | 1119 (18.84) | <0.001 |
| Active social contact               | 5686 (24.58)  | 1250 (21.05) | <0.001 |
| Healthy diet                        | 11420 (49.37) | 2884 (48.56) | 0.27   |
| Number of healthy lifestyle factors |               |              |        |
| 0                                   | 837 (3.62)    | 258 (4.34)   | <0.001 |
| 1                                   | 4528 (19.57)  | 1344 (22.63) |        |
| 2                                   | 7184 (31.06)  | 1944 (32.73) |        |
| 3                                   | 5992 (25.90)  | 1429 (24.06) |        |
| 4                                   | 3552 (15.35)  | 741 (12.48)  |        |
| 5-6                                 | 1040 (4.50)   | 223 (3.75)   |        |
| Average follow-up period (years)    | 6.71 (2.28)   | 6.41 (2.25)  | <0.001 |

---

Notes: Differences in covariates were compared among the two groups, using analyses of variance and chi-square tests for continuous and categorical variables, respectively. SD, standard deviation; no., number; BMI, body mass index; MMSE, Mini Mental State Examination; APOE, apolipoprotein E.

**5. Supplementary table 3. Global cognition trajectory in the cognitively normal population using linear mixed effect model**

|                    | Estimate | Standard Error | P     |
|--------------------|----------|----------------|-------|
| (Intercept)        | 0.038    | 0.014          | 0.006 |
| Age                | 0.002    | 0.001          | 0.011 |
| Age <sup>2</sup>   | -0.000   | 0.001          | 0.161 |
| Female             | -0.006   | 0.008          | 0.491 |
| Years of education |          |                |       |
| 1-6 years          | 0.011    | 0.013          | 0.395 |
| 7-12 years         | -0.002   | 0.013          | 0.878 |
| > 12 years         | 0.031    | 0.017          | 0.070 |
| Region             |          |                |       |
| West               | 0.001    | 0.011          | 0.944 |
| South              | 0.013    | 0.010          | 0.199 |

**6. Supplementary table 4. Memory trajectory in the cognitively normal population using linear mixed effect model**

|                           | <b>Estimate</b> | <b>Standard Error</b> | <b>P</b> |
|---------------------------|-----------------|-----------------------|----------|
| (Intercept)               | -9.852          | 0.149                 | <0.001   |
| Baseline age              | 0.127           | 0.002                 | <0.001   |
| Age                       | -0.161          | 0.002                 | <0.001   |
| Baseline age <sup>2</sup> | -0.000          | 0.000                 | <0.001   |
| Age <sup>2</sup>          | 0.001           | 0.000                 | <0.001   |
| Female                    | -0.009          | 0.003                 | 0.008    |
| Years of education        |                 |                       |          |
| 1-6 years                 | 0.013           | 0.005                 | 0.014    |
| 7-12 years                | 0.014           | 0.005                 | 0.004    |
| >12 years                 | 0.011           | 0.007                 | 0.086    |
| Baseline memory           | 0.334           | 0.003                 | <0.001   |
| Region                    |                 |                       |          |
| West                      | -0.015          | 0.004                 | <0.001   |
| South                     | -0.034          | 0.004                 | <0.001   |

**7. Supplementary table 5. Longitudinal change in memory among APOE ε4 carriers and non-carriers**

|                                    | Estimate | Standard Error | P      |
|------------------------------------|----------|----------------|--------|
| (Intercept)                        | -1.097   | 0.041          | <0.001 |
| APOE ε4 carriers                   | 0.019    | 0.005          | <0.001 |
| Age                                | -0.034   | 0.000          | <0.001 |
| Age <sup>2</sup>                   | 0.001    | 0.000          | <0.001 |
| Female                             | -0.009   | 0.003          | 0.005  |
| Years of education                 |          |                |        |
| 1-6 years                          | 0.012    | 0.005          | 0.020  |
| 7-12 years                         | 0.013    | 0.005          | 0.007  |
| > 12 years                         | 0.011    | 0.007          | 0.097  |
| Region                             |          |                |        |
| West                               | -0.016   | 0.004          | <0.001 |
| South                              | -0.033   | 0.004          | 0.001  |
| Baseline memory                    | 0.330    | 0.003          | <0.001 |
| APOE ε4 carriers: age              | 0.002    | 0.001          | 0.007  |
| APOE ε4 carriers: age <sup>2</sup> | -0.000   | 0.000          | 0.229  |

**8. Supplementary table 6. Longitudinal change in memory associated with each lifestyle factor in the cognitively normal population**

|                                 | Estimate | Standard Error | P      |
|---------------------------------|----------|----------------|--------|
| (Intercept)                     | -0.462   | 0.016          | <0.001 |
| Regular physical exercise       | 0.002    | 0.006          | 0.806  |
| Active social contact           | 0.002    | 0.006          | 0.810  |
| Healthy diet                    | 0.016    | 0.005          | 0.004  |
| Never or former smoking         | 0.021    | 0.007          | 0.002  |
| Never drinking                  | -0.004   | 0.006          | 0.445  |
| Active cognitive activity       | 0.013    | 0.006          | 0.045  |
| Baseline memory score           | -0.050   | 0.000          | <0.001 |
| Learning effect                 | 0.334    | 0.017          | <0.001 |
| Age                             | -0.050   | 0.000          | <0.001 |
| Age <sup>2</sup>                | 0.001    | 0.000          | <0.001 |
| Time                            | -0.134   | 0.003          | <0.001 |
| Female                          | -0.012   | 0.004          | 0.001  |
| Years of education              |          |                |        |
| 1-6 years                       | 0.015    | 0.006          | 0.012  |
| 7-12 years                      | 0.011    | 0.006          | 0.044  |
| >12 years                       | 0.002    | 0.007          | 0.797  |
| Region                          |          |                |        |
| West                            | -0.015   | 0.005          | <0.001 |
| South                           | -0.027   | 0.005          | <0.001 |
| Regular physical exercise: time | 0.007    | 0.001          | <0.001 |
| Active social contact: time     | 0.004    | 0.001          | <0.001 |
| Healthy diet: time              | 0.016    | 0.001          | <0.001 |
| Never or former smoking: time   | 0.004    | 0.002          | 0.026  |
| Never drinking: time            | 0.002    | 0.001          | 0.048  |
| Active cognitive activity: time | 0.010    | 0.001          | <0.001 |

**9. Supplementary table 7. Lifestyle effect on memory decline with age increasing in the cognitively normal population**

|                                         | Estimate | Standard Error | P      |
|-----------------------------------------|----------|----------------|--------|
| (Intercept)                             | -1.327   | 0.032          | <0.001 |
| Average group                           | 0.017    | 0.006          | 0.004  |
| Favourable group                        | 0.052    | 0.007          | <0.001 |
| Age                                     | -0.040   | 0.003          | <0.001 |
| Age <sup>2</sup>                        | 0.001    | 0.000          | <0.001 |
| APOE ε4 non-carriers                    | 0.051    | 0.012          | <0.001 |
| Female                                  | -0.007   | 0.003          | 0.055  |
| Years of education                      |          |                |        |
| 1-6 years                               | 0.010    | 0.005          | 0.053  |
| 7-12 years                              | 0.012    | 0.005          | 0.026  |
| > 12 years                              | 0.010    | 0.007          | 0.161  |
| Region                                  |          |                |        |
| West                                    | -0.010   | 0.004          | 0.021  |
| South                                   | -0.026   | 0.004          | <0.001 |
| Place of residence                      |          |                |        |
| Urban                                   | -0.002   | 0.003          | 0.620  |
| Marital status                          |          |                |        |
| Divorced, separated, or single          | 0.002    | 0.007          | 0.731  |
| Married                                 | 0.081    | 0.005          | <0.001 |
| Monthly household income (Chinese Yuan) |          |                |        |
| 3000-4999                               | -0.005   | 0.007          | 0.473  |
| 5000-10000                              | -0.007   | 0.007          | 0.277  |
| >10000                                  | 0.013    | 0.012          | 0.266  |
| Occupation                              |          |                |        |
| Office worker                           | 0.007    | 0.004          | 0.095  |
| Household                               | -0.001   | 0.005          | 0.777  |
| Others                                  | 0.003    | 0.006          | 0.570  |
| Learning effect                         | 0.803    | 0.004          | <0.001 |
| Baseline memory score                   | 0.231    | 0.003          | <0.001 |
| BMI (kg/m <sup>2</sup> )                | -0.004   | 0.000          | <0.001 |
| Medical illness                         |          |                |        |
| No depression                           | 0.000    | 0.008          | 0.966  |
| No diabetes                             | 0.026    | 0.004          | <0.001 |

|                                                           |        |       |        |
|-----------------------------------------------------------|--------|-------|--------|
| No head injury                                            | 0.144  | 0.005 | <0.001 |
| No hyperlipidemia                                         | 0.058  | 0.005 | <0.001 |
| No heart attack                                           | 0.079  | 0.006 | <0.001 |
| No hypertension                                           | 0.022  | 0.003 | <0.001 |
| No cerebrovascular disease                                | 0.070  | 0.005 | <0.001 |
| Average group: age                                        | -0.002 | 0.001 | 0.033  |
| Favourable group: age                                     | -0.007 | 0.001 | <0.001 |
| Average group: age <sup>2</sup>                           | 0.000  | 0.000 | 0.143  |
| Favourable group: age <sup>2</sup>                        | 0.000  | 0.000 | 0.821  |
| APOE ε4 non-carriers: age                                 | 0.006  | 0.002 | <0.001 |
| APOE ε4 non-carriers: age <sup>2</sup>                    | 0.000  | 0.000 | 0.685  |
| Average group: APOE ε4 non-carriers                       | 0.024  | 0.013 | 0.069  |
| Favourable group: APOE ε4 non-carriers                    | 0.014  | 0.016 | 0.392  |
| BMI (kg/m <sup>2</sup> ): age                             | -0.000 | 0.000 | <0.001 |
| No depression: age                                        | -0.003 | 0.001 | 0.008  |
| No diabetes: age                                          | 0.000  | 0.001 | 0.762  |
| No head injury: age                                       | 0.006  | 0.001 | <0.001 |
| No hyperlipidaemia: age                                   | 0.002  | 0.001 | 0.014  |
| No heart attack: age                                      | 0.001  | 0.001 | 0.306  |
| No hypertension: age                                      | 0.002  | 0.001 | <0.001 |
| No cerebrovascular disease: age                           | 0.003  | 0.001 | <0.001 |
| Average group: age: APOE ε4 non-carriers                  | -0.002 | 0.002 | 0.295  |
| Favourable group: age: APOE ε4 non-carriers               | -0.001 | 0.002 | 0.733  |
| Average group: age <sup>2</sup> : APOE ε4 non-carriers    | -0.000 | 0.000 | 0.231  |
| Favourable group: age <sup>2</sup> : APOE ε4 non-carriers | -0.000 | 0.000 | 0.740  |

---



**10. Supplementary table 8. Hazard ratios for the onset of dementia and MCI in the unfavourable, average, and favourable groups for APOE stratified population**

| Time-dependent Cox regression model, HR of dementia and MCI in three lifestyle groups (95% CI) |                        |        |                         |        |                        |        |
|------------------------------------------------------------------------------------------------|------------------------|--------|-------------------------|--------|------------------------|--------|
|                                                                                                | Model 1                | P      | Model 2                 | P      | Model 3                | P      |
| Unfavourable                                                                                   | Reference              |        | Reference               |        | Reference              |        |
| Average                                                                                        | 0.705<br>(0.682-0.730) | <0.001 | 0.720<br>(0.707-0.733)  | <0.001 | 0.725<br>(0.700-0.750) | <0.001 |
| Favourable                                                                                     | 0.112<br>(0.102-0.123) | <0.001 | 0.119<br>(0.109-0.129)  | <0.001 | 0.120<br>(0.109-0.132) | <0.001 |
| <b>APOE ε4 non-carriers</b>                                                                    |                        |        |                         |        |                        |        |
| Unfavourable                                                                                   | Reference              |        | Reference               |        | References             |        |
| Average                                                                                        | 0.687<br>(0.661-0.714) | <0.001 | 0.698<br>(0.671-0.726)  | <0.001 | 0.704<br>(0.677-0.732) | <0.001 |
| Favourable                                                                                     | 0.102<br>(0.092-0.114) | <0.001 | 0.107<br>(0.096-0.119)  | <0.001 | 0.108<br>(0.097-0.120) | <0.001 |
| <b>APOE ε4 carriers</b>                                                                        |                        |        |                         |        |                        |        |
| Unfavourable                                                                                   | Reference              |        | Reference               |        |                        |        |
| Average                                                                                        | 0.780<br>(0.729-0.836) | <0.001 | 0.788<br>(0.736-0.845)  | <0.001 | 0.790<br>(0.737-0.845) | <0.001 |
| Favourable                                                                                     | 0.163<br>(0.136-0.196) | <0.001 | 0.169<br>(0.141- 0.204) | <0.001 | 0.172<br>(0.143-0.207) | <0.001 |

\*Unfavourable group as the reference group.

Model 1 unadjusted for covariates.

Model 2 adjusted for covariates.

Model 3 adjusted with the death as the competing risk

**11. Supplementary table 9. Association between different lifestyle groups with cognitive impairment using the inverse probability weighting method**

|              | <b>Model 1</b>      | <b>P</b> | <b>Model 2</b>      | <b>P</b> |
|--------------|---------------------|----------|---------------------|----------|
| Unfavourable | Reference           |          | Reference           |          |
| Average      | 0.559 (0.541-0.577) | <0.001   | 0.559 (0.541-0.577) | <0.001   |
| Favourable   | 0.052 (0.046-0.058) | <0.001   | 0.052 (0.046-0.057) | <0.001   |

\*Unfavourable group as the reference group.

Model 1: Analyzed using the inverse probability weighting method, in which the variables were not adjusted.

Model 2: Analyzed using the inverse probability weighting method considering covariates.

**12. Supplementary table 10. Longitudinal change in memory associated with the number of lifestyle factors in the cognitively normal population**

|                                             | Estimate | Standard Error | P      |
|---------------------------------------------|----------|----------------|--------|
| (Intercept)                                 | -0.400   | 0.023          | <0.001 |
| Number of healthy lifestyle factors         |          |                |        |
| 1                                           | -0.010   | 0.016          | 0.525  |
| 2                                           | -0.011   | 0.015          | 0.485  |
| 3                                           | 0.003    | 0.015          | 0.833  |
| 4                                           | 0.025    | 0.016          | 0.126  |
| 5-6                                         | 0.023    | 0.019          | 0.210  |
| Time                                        | -0.150   | 0.005          | <0.001 |
| Age                                         | -0.033   | 0.000          | <0.001 |
| Age <sup>2</sup>                            | 0.001    | 0.000          | <0.001 |
| Baseline memory score                       | 0.328    | 0.003          | <0.001 |
| Learning effect                             | 0.353    | 0.021          | <0.001 |
| Female                                      | -0.009   | 0.003          | 0.004  |
| Years of education                          |          |                |        |
| 1-6 years                                   | 0.012    | 0.005          | 0.018  |
| 7-12 years                                  | 0.013    | 0.005          | 0.010  |
| >12 years                                   | 0.010    | 0.007          | 0.137  |
| Region                                      |          |                |        |
| West                                        | -0.015   | 0.004          | <0.001 |
| South                                       | -0.032   | 0.004          | <0.001 |
| Number of lifestyle factors*time            |          |                |        |
| One healthy lifestyle factor: time          | 0.004    | 0.005          | 0.380  |
| Two healthy lifestyle factors: time         | 0.016    | 0.004          | <0.001 |
| Three healthy lifestyle factors: time       | 0.020    | 0.004          | <0.001 |
| Four healthy lifestyle factors: time        | 0.028    | 0.004          | <0.001 |
| Five or six healthy lifestyle factors: time | 0.037    | 0.005          | <0.001 |

### 13. Supplementary table 11. Weighted scores of each health lifestyle factor based on $\beta$ coefficient

|                           | Estimate      | P      | Weighted Score |
|---------------------------|---------------|--------|----------------|
| Never drinking            |               |        |                |
| No                        | 0 (reference) |        | 0              |
| Yes                       | 0.002         | 0.048  | 6              |
| Never or former smoking   |               |        |                |
| No                        | 0 (reference) |        | 0              |
| Yes                       | 0.004         | 0.026  | 9              |
| Healthy diet              |               |        |                |
| No                        | 0 (reference) |        | 0              |
| Yes                       | 0.016         | <0.001 | 36             |
| Regular physical exercise |               |        |                |
| No                        | 0 (reference) |        | 0              |
| Yes                       | 0.007         | <0.001 | 17             |
| Active cognitive activity |               |        |                |
| No                        | 0 (reference) |        | 0              |
| Yes                       | 0.010         | <0.001 | 23             |
| Active social contact     |               |        |                |
| No                        | 0 (reference) |        | 0              |
| Yes                       | 0.004         | <0.001 | 10             |

**Notes:**

A healthy diet is defined as adherence to the appropriate amounts of at least 7 of the 12 dietary components. Regular physical exercise is defined as spending at least 150 or 75 min/week performing moderate or vigorous physical activity, respectively. Active cognitive activity is defined as participating in cognitive activities (including writing, reading, playing cards, mah-jong, and gaming) at least twice per week. Active social contact is defined as participating in social activities (including attending meetings or parties, visiting friends or relatives, traveling, and chatting online) at least twice per week. Never drinking and never or former smoking were also regarded as healthy factors.

**14. Supplementary table 12. Longitudinal change in memory associated with the weighted lifestyle score in the cognitively normal population**

|                                | Estimate | Standard Error | P      |
|--------------------------------|----------|----------------|--------|
| (Intercept)                    | -0.414   | 0.017          | <0.001 |
| Intermediate score group       | 0.013    | 0.006          | 0.017  |
| High score group               | 0.040    | 0.008          | <0.001 |
| Time                           | -0.144   | 0.003          | <0.001 |
| Age                            | -0.033   | 0.000          | <0.001 |
| Age <sup>2</sup>               | 0.001    | 0.000          | <0.001 |
| Baseline memory score          | 0.327    | 0.003          | <0.001 |
| Learning effect                | 0.354    | 0.021          | <0.001 |
| Female                         | -0.010   | 0.003          | 0.003  |
| Years of education             |          |                |        |
| 1-6 years                      | 0.012    | 0.005          | 0.017  |
| 7-12 years                     | 0.013    | 0.005          | 0.009  |
| >12 years                      | 0.011    | 0.007          | 0.106  |
| Region                         |          |                |        |
| West                           | -0.014   | 0.004          | <0.001 |
| South                          | -0.031   | 0.004          | <0.001 |
| Intermediate score group: time | 0.017    | 0.001          | <0.001 |
| High score group: time         | 0.029    | 0.002          | <0.001 |

**15. Supplementary table 13. Longitudinal change in memory after excluding each healthy lifestyle factor in the cognitively normal population**

|                              | Estimate | Standard Error | P      |
|------------------------------|----------|----------------|--------|
| <b>No diet</b>               |          |                |        |
| (Intercept)                  | -0.483   | 0.003          | <0.001 |
| Average group*time           | 0.005    | 0.001          | <0.001 |
| Favourable group*time        | 0.016    | 0.002          | <0.001 |
| <b>No cognitive activity</b> |          |                |        |
| (Intercept)                  | -0.480   | 0.003          | <0.001 |
| Average group*time           | 0.016    | 0.002          | <0.001 |
| Favourable group*time        | 0.025    | 0.002          | <0.001 |
| <b>No physical exercise</b>  |          |                |        |
| (Intercept)                  | -0.481   | 0.003          | <0.001 |
| Average group*time           | 0.016    | 0.002          | <0.001 |
| Favourable group*time        | 0.026    | 0.002          | <0.001 |
| <b>No social contact</b>     |          |                |        |
| (Intercept)                  | -0.480   | 0.003          | <0.001 |
| Average group*time           | 0.016    | 0.002          | <0.001 |
| Favourable group*time        | 0.027    | 0.002          | <0.001 |
| <b>No smoking</b>            |          |                |        |
| (Intercept)                  | -0.476   | 0.003          | <0.001 |
| Average group*time           | 0.011    | 0.001          | <0.001 |
| Favourable group*time        | 0.025    | 0.002          | <0.001 |
| <b>No drinking</b>           |          |                |        |
| (Intercept)                  | -0.476   | 0.003          | <0.001 |
| Average group*time           | 0.015    | 0.001          | <0.001 |
| Favourable group*time        | 0.028    | 0.002          | <0.001 |

**16. Supplementary table 14. Lifestyle effect on memory in participants without mild cognitive impairment or dementia throughout the follow-up**

|                        | Estimate | Standard Error | P      |
|------------------------|----------|----------------|--------|
| (Intercept)            | -0.426   | 0.020          | <0.001 |
| Average group          | 0.017    | 0.014          | 0.206  |
| Favourable group       | 0.051    | 0.014          | <0.001 |
| Time                   | -0.155   | 0.004          | <0.001 |
| Age                    | -0.036   | 0.001          | <0.001 |
| Age <sup>2</sup>       | 0.001    | 0.000          | <0.001 |
| Baseline memory score  | 0.296    | 0.005          | <0.001 |
| Learning effect        | 0.342    | 0.018          | <0.001 |
| Female                 | -0.009   | 0.005          | 0.045  |
| Years of education     |          |                |        |
| 1-6 years              | 0.019    | 0.007          | 0.007  |
| 7-12 years             | 0.013    | 0.007          | 0.054  |
| >12 years              | 0.007    | 0.009          | 0.464  |
| Region                 |          |                |        |
| West                   | -0.021   | 0.006          | <0.001 |
| South                  | -0.034   | 0.006          | <0.001 |
| Average group: time    | 0.017    | 0.003          | <0.001 |
| Favourable group: time | 0.034    | 0.003          | <0.001 |

**17. Supplementary table 15. Lifestyle effect on memory in participants without drop out or death throughout the follow-up**

|                        | Estimate | Standard Error | P      |
|------------------------|----------|----------------|--------|
| (Intercept)            | -0.375   | 0.019          | <0.001 |
| Average group          | 0.009    | 0.008          | 0.240  |
| Favourable group       | 0.059    | 0.010          | <0.001 |
| Time                   | -0.150   | 0.003          | <0.001 |
| Age                    | -0.035   | 0.000          | <0.001 |
| Age <sup>2</sup>       | 0.001    | 0.000          | <0.001 |
| Baseline memory score  | 0.284    | 0.004          | <0.001 |
| Learning effect        | 0.300    | 0.021          | <0.001 |
| Female                 | -0.008   | 0.004          | 0.038  |
| Years of education     |          |                |        |
| 1-6 years              | 0.015    | 0.006          | 0.014  |
| 7-12 years             | 0.017    | 0.006          | 0.006  |
| >12 years              | 0.019    | 0.008          | 0.021  |
| Region                 |          |                |        |
| West                   | -0.013   | 0.005          | 0.009  |
| South                  | -0.035   | 0.005          | <0.001 |
| Average group: time    | 0.016    | 0.002          | <0.001 |
| Favourable group: time | 0.025    | 0.002          | <0.001 |



18. Supplementary figure 1. Directed acyclic graphs (DAG)

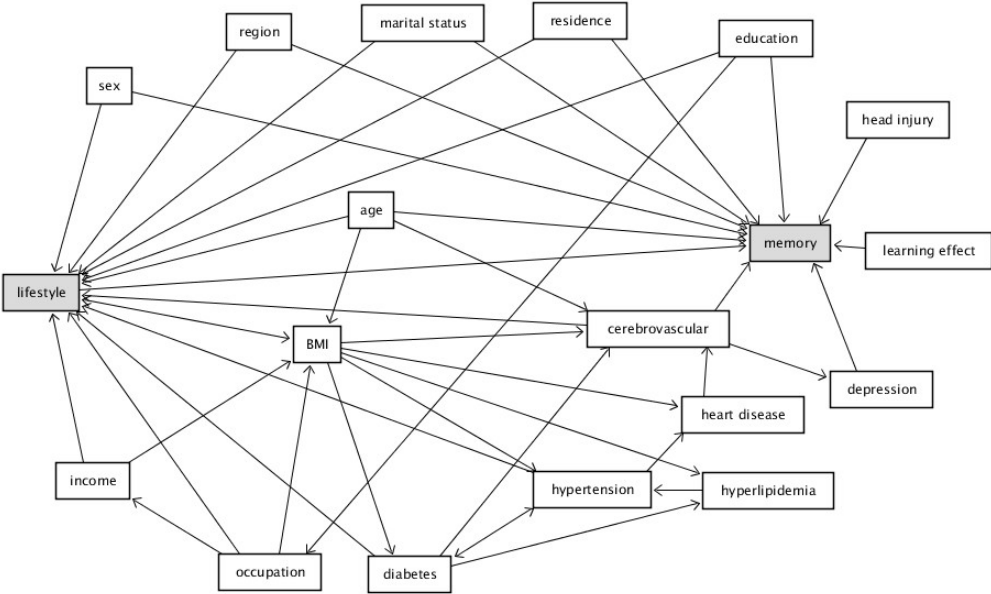

**19. Supplementary figure 2. Global cognition and memory trajectories in the cognitively normal and APOE  $\epsilon$ 4 stratified populations**

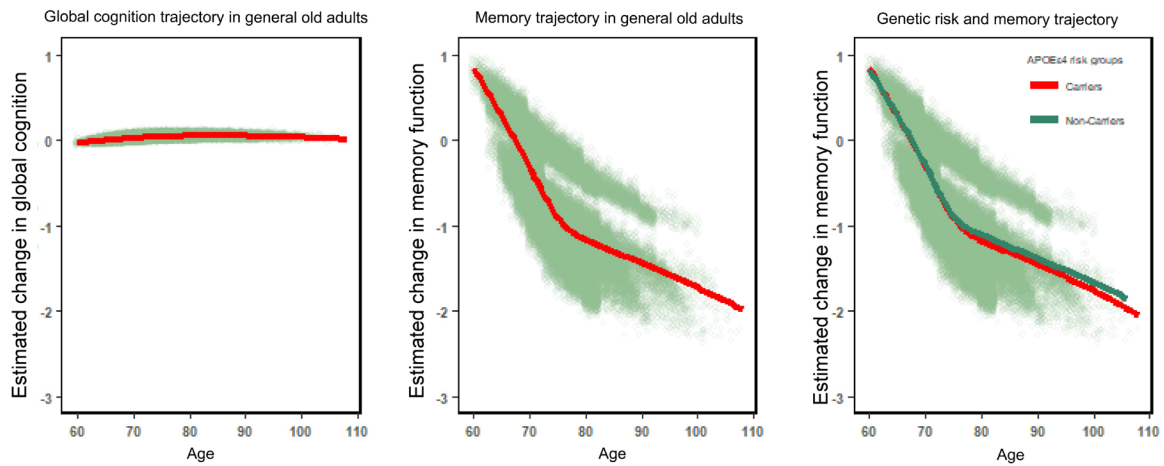

In cognitively normal older adults, global function (MMSE score) remains stable (left panel), memory performance (composite AVLT z score) declines rapidly (middle panel), and memory declines faster in APOE  $\epsilon$ 4 carriers than in non-carriers (right panel). Dots represent individuals' estimated z scores for MMSE or AVLT. Memory trajectories were calculated via linear mixed models, adjusted for covariates. MMSE, Mini-Mental State Examination; AVLT, auditory verbal learning test; APOE, apolipoprotein E.

**20. Supplementary figure 3. Test of reverse causality between lifestyle and memory function**

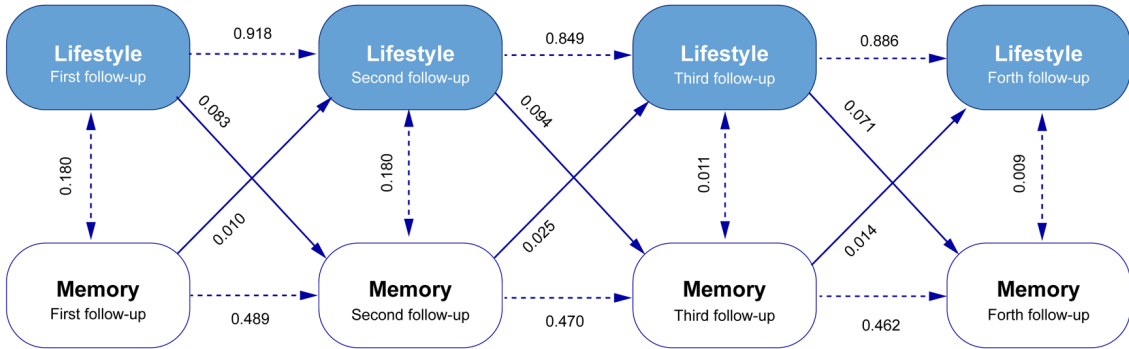

The cross-lagged models show the associations between the lifestyle profile and memory scores; Cross-lag pathways are used to show the results at the different follow-up time points. Path coefficients (the numbers in the figure e.g., 0.014, 0.010, etc.) are the standardized values.

## References

1. Skoog I, Lernfelt B, Landahl S, et al. 15-year longitudinal study of blood pressure and dementia. *Lancet* 1996;347:1141-5.
2. Kivipelto M, Helkala EL, Laakso MP, et al. Midlife vascular risk factors and Alzheimer's disease in later life: longitudinal, population based study. *BMJ* 2001;322:1447-51.
3. Biessels GJ, Staekenborg S, Brunner E, Brayne C, Scheltens P. Risk of dementia in diabetes mellitus: a systematic review. *Lancet Neurol* 2006;5:64-74.
4. Schnaider BM, Goldbourt U, Silverman JM, et al. Diabetes mellitus in midlife and the risk of dementia three decades later. *Neurology* 2004;63:1902-7.
5. Ott A, Stolk RP, van Harskamp F, Pols HA, Hofman A, Breteler MM. Diabetes mellitus and the risk of dementia: The Rotterdam Study. *Neurology* 1999;53:1937-42.
6. Kivipelto M, Laakso MP, Tuomilehto J, Nissinen A, Soininen H. Hypertension and hypercholesterolaemia as risk factors for Alzheimer's disease: potential for pharmacological intervention. *CNS Drugs* 2002;16:435-44.
7. Yaffe K, Barrett-Connor E, Lin F, Grady D. Serum lipoprotein levels, statin use, and cognitive function in older women. *Arch Neurol* 2002;59:378-84.
8. Solomon A, Kareholt I, Ngandu T, et al. Serum cholesterol changes after midlife and late-life cognition: twenty-one-year follow-up study. *Neurology* 2007;68:751-6.
9. Kalmijn S, Foley D, White L, et al. Metabolic cardiovascular syndrome and risk of dementia in Japanese-American elderly men. The Honolulu-Asia aging study. *Arterioscler Thromb Vasc Biol* 2000;20:2255-60.
10. Vermeer SE, Prins ND, den Heijer T, Hofman A, Koudstaal PJ, Breteler MM. Silent brain infarcts and the risk of dementia and cognitive decline. *N Engl J Med* 2003;348:1215-22.
11. Vermeer SE, Longstreth WT, Jr., Koudstaal PJ. Silent brain infarcts: a systematic review. *Lancet Neurol* 2007;6:611-9.
12. Whitmer RA, Sidney S, Selby J, Johnston SC, Yaffe K. Midlife cardiovascular risk factors and risk of dementia in late life. *Neurology* 2005;64:277-81.
13. van Duinen SG, Castano EM, Prelli F, Bots GT, Luyendijk W, Frangione B. Hereditary cerebral hemorrhage with amyloidosis in patients of Dutch origin is related to Alzheimer disease. *Proc Natl Acad Sci U S A* 1987;84:5991-4.
14. Rippon GA, Tang MX, Lee JH, Lantigua R, Medrano M, Mayeux R. Familial Alzheimer disease in Latinos: interaction between APOE, stroke, and estrogen replacement. *Neurology* 2006;66:35-40.
15. Whitmer RA, Gunderson EP, Barrett-Connor E, Quesenberry CP, Jr., Yaffe K. Obesity in middle age and future risk of dementia: a 27 year longitudinal population based study. *BMJ* 2005;330:1360.
16. Gustafson D, Rothenberg E, Blennow K, Steen B, Skoog I. An 18-Year Follow-up of Overweight and Risk of Alzheimer Disease. *Arch Intern Med* 2003;163:1524-8.
17. Gustafson D. Adiposity indices and dementia. *Lancet Neurol* 2006;5:713-20.
18. Ott A, Slioter AJ, Hofman A, et al. Smoking and risk of dementia and Alzheimer's disease in a population-based cohort study: the Rotterdam Study. *Lancet* 1998;351:1840-3.
19. Reitz C, den Heijer T, van Duijn C, Hofman A, Breteler MM. Relation between smoking and risk of dementia and Alzheimer disease: the Rotterdam Study. *Neurology* 2007;69:998-1005.
20. Stern Y, Gurland B, Tatemichi TK, Tang MX, Wilder D, Mayeux R. Influence of education and occupation on the incidence of Alzheimer's disease. *JAMA* 1994;271:1004-10.
21. Rovio S, Kareholt I, Helkala EL, et al. Leisure-time physical activity at midlife and the risk of dementia and Alzheimer's disease. *Lancet Neurol* 2005;4:705-11.
22. Bassuk SS, Glass TA, Berkman LF. Social disengagement and incident cognitive decline in community-dwelling elderly persons. *Ann Intern Med* 1999;131:165-73.

23. Fratiglioni L, Wang HX, Ericsson K, Maytan M, Winblad B. Influence of social network on occurrence of dementia: a community-based longitudinal study. *Lancet* 2000;355:1315-9.
24. Ruitenberg A, van Swieten JC, Wittman JC, et al. Alcohol consumption and risk of dementia: the Rotterdam Study. *Lancet* 2002;359:281-6.
25. Graves AB, White E, Koepsell TD, et al. The association between head trauma and Alzheimer's disease. *Am J Epidemiol* 1990;131:491-501.
26. Gottlieb S. Head injury doubles the risk of Alzheimer's disease. *BMJ* 2000;321:1100.
27. Speck CE, Kukull WA, Brenner DE, et al. History of depression as a risk factor for Alzheimer's disease. *Epidemiology* 1995;6:366-9.
28. Stampfer MJ, Kang JH, Chen J, Cherry R, Grodstein F. Effects of moderate alcohol consumption on cognitive function in women. *Engl J Med* 2005;352:245-53.
29. Carretero OA, Oparil S. Essential hypertension: part I: definition and etiology. *Circulation* 2000;101:329-35.
30. Association AD. Report of the expert committee on the diagnosis and classification of diabetes mellitus. *Diabetes care* 2003;26:s5-s20.
31. Group TMOD. VA/DOD clinical practice guideline for the management of dyslipidemia. 2006.
32. Yesavage JA, Brink TL, Rose TL, et al. Development and validation of a geriatric depression screening scale: A preliminary report. *J Psychiatr Res* 1982; 17(1): 37-49.
33. Organization WH. International guide for monitoring alcohol consumption and related harm: World Health Organization; 2000.
34. Chinese Nutrition Society. Chinese dietary guideline (2007). *the Tibet People's Publishing House*, 2008
35. Reducing salt intake in populations: report of a WHO forum and technical meeting. 2007.
36. Ng T-P, Feng L, Niti M, Kua E-H, Yap K-B. Tea consumption and cognitive impairment and decline in older Chinese adults. *Am J Clin Nutr* 2008;88:224-31.
37. Lautenschlager NT, Cox KL, Flicker L, et al. Effect of physical activity on cognitive function in older adults at risk for Alzheimer disease: a randomized trial. *JAMA* 2008;300:1027-37.
38. Pate RR, Pratt M, Blair SN, et al. Physical activity and public health. A recommendation from the Centers for Disease Control and Prevention and the American College of Sports Medicine. *JAMA* 1995;273:402-7.
39. Abbott R D, White L R, Ross G W, et al. Walking and dementia in physically capable elderly men. *JAMA* 2004; 292: 1447-1453.
40. Verghese J, Lipton RB, Katz MJ, et al. Leisure activities and the risk of dementia in the elderly. *N Engl J Med* 2003;348:2508-16.
41. Wang JY, Zhou DH, Li J, et al. Leisure activity and risk of cognitive impairment: the Chongqing aging study. *Neurology* 2006;66:911-3.
42. Wilson RS, Mendes DL, Barnes LL, et al. Participation in cognitively stimulating activities and risk of incident Alzheimer disease. *JAMA* 2002;287:742-8.
43. Scarmeas N, Levy G, Tang MX, Manly J, Stern Y. Influence of leisure activity on the incidence of Alzheimer's disease. *Neurology* 2001;57:2236-42.
44. Fabrigoule C, Letenneur L, Dartigues JF, Zarrouk M, Commenges D, Barberger-Gateau P. Social and leisure activities and risk of dementia: a prospective longitudinal study. *J Am Geriatr Soc* 1995;43:485-90.
45. Saczynski JS, Pfeifer LA, Masaki K, et al. The effect of social engagement on incident dementia: the Honolulu-Asia Aging Study. *Am J Epidemiol* 2006;163:433-40.
